# Supplementary material for: A novel photochromic multilayer based on preyssler's clusterElectronic supplementary information (ESI) available: ESR spectrum of the NaP5W30/PEI sample after irradiation. See http://www.rsc.org/suppdata/nj/b3/b305578g/
Source: Royal Society of Chemistry journal article supplement (doi:10.1039/b305578g), 2003-01-01
Supplement: b305578g.pdf [file b305578g.pdf]

## Supplementary information

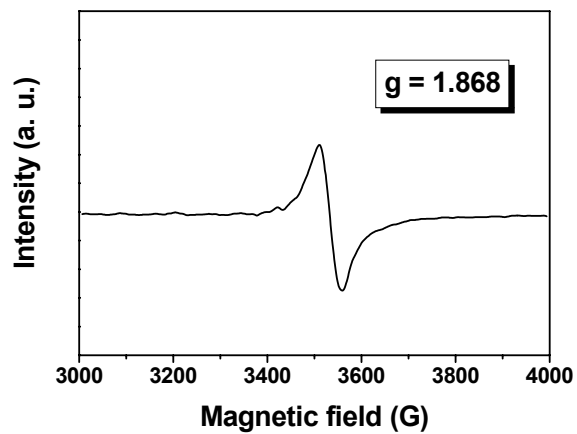

ESR spectrum measured at 298 K of the  $\text{NaP}_5\text{W}_{30}/\text{PEI}$  sample after 10 min of UV irradiation by a 500 W high pressure Hg lamp.
